# Supplementary material for: Essential role of proline synthesis and the one-carbon metabolism pathways for systemic virulence of Streptococcus pneumoniae
Source: PubMed Central journal article supplement (PMC11559097; doi:10.1128/mbio.01758-24), 2024-10-18

# Supplementary Figure 1

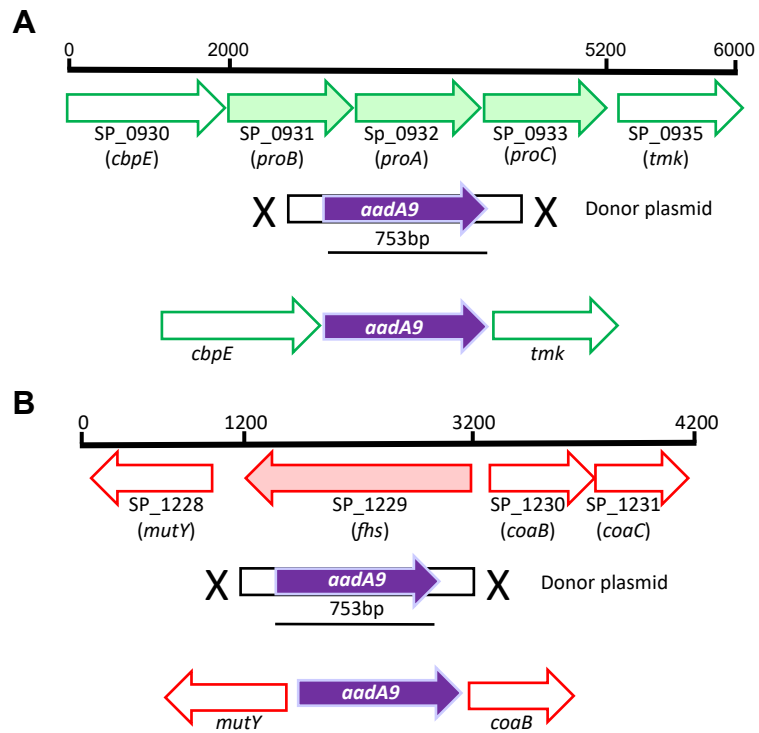

Supplementary Figure 2

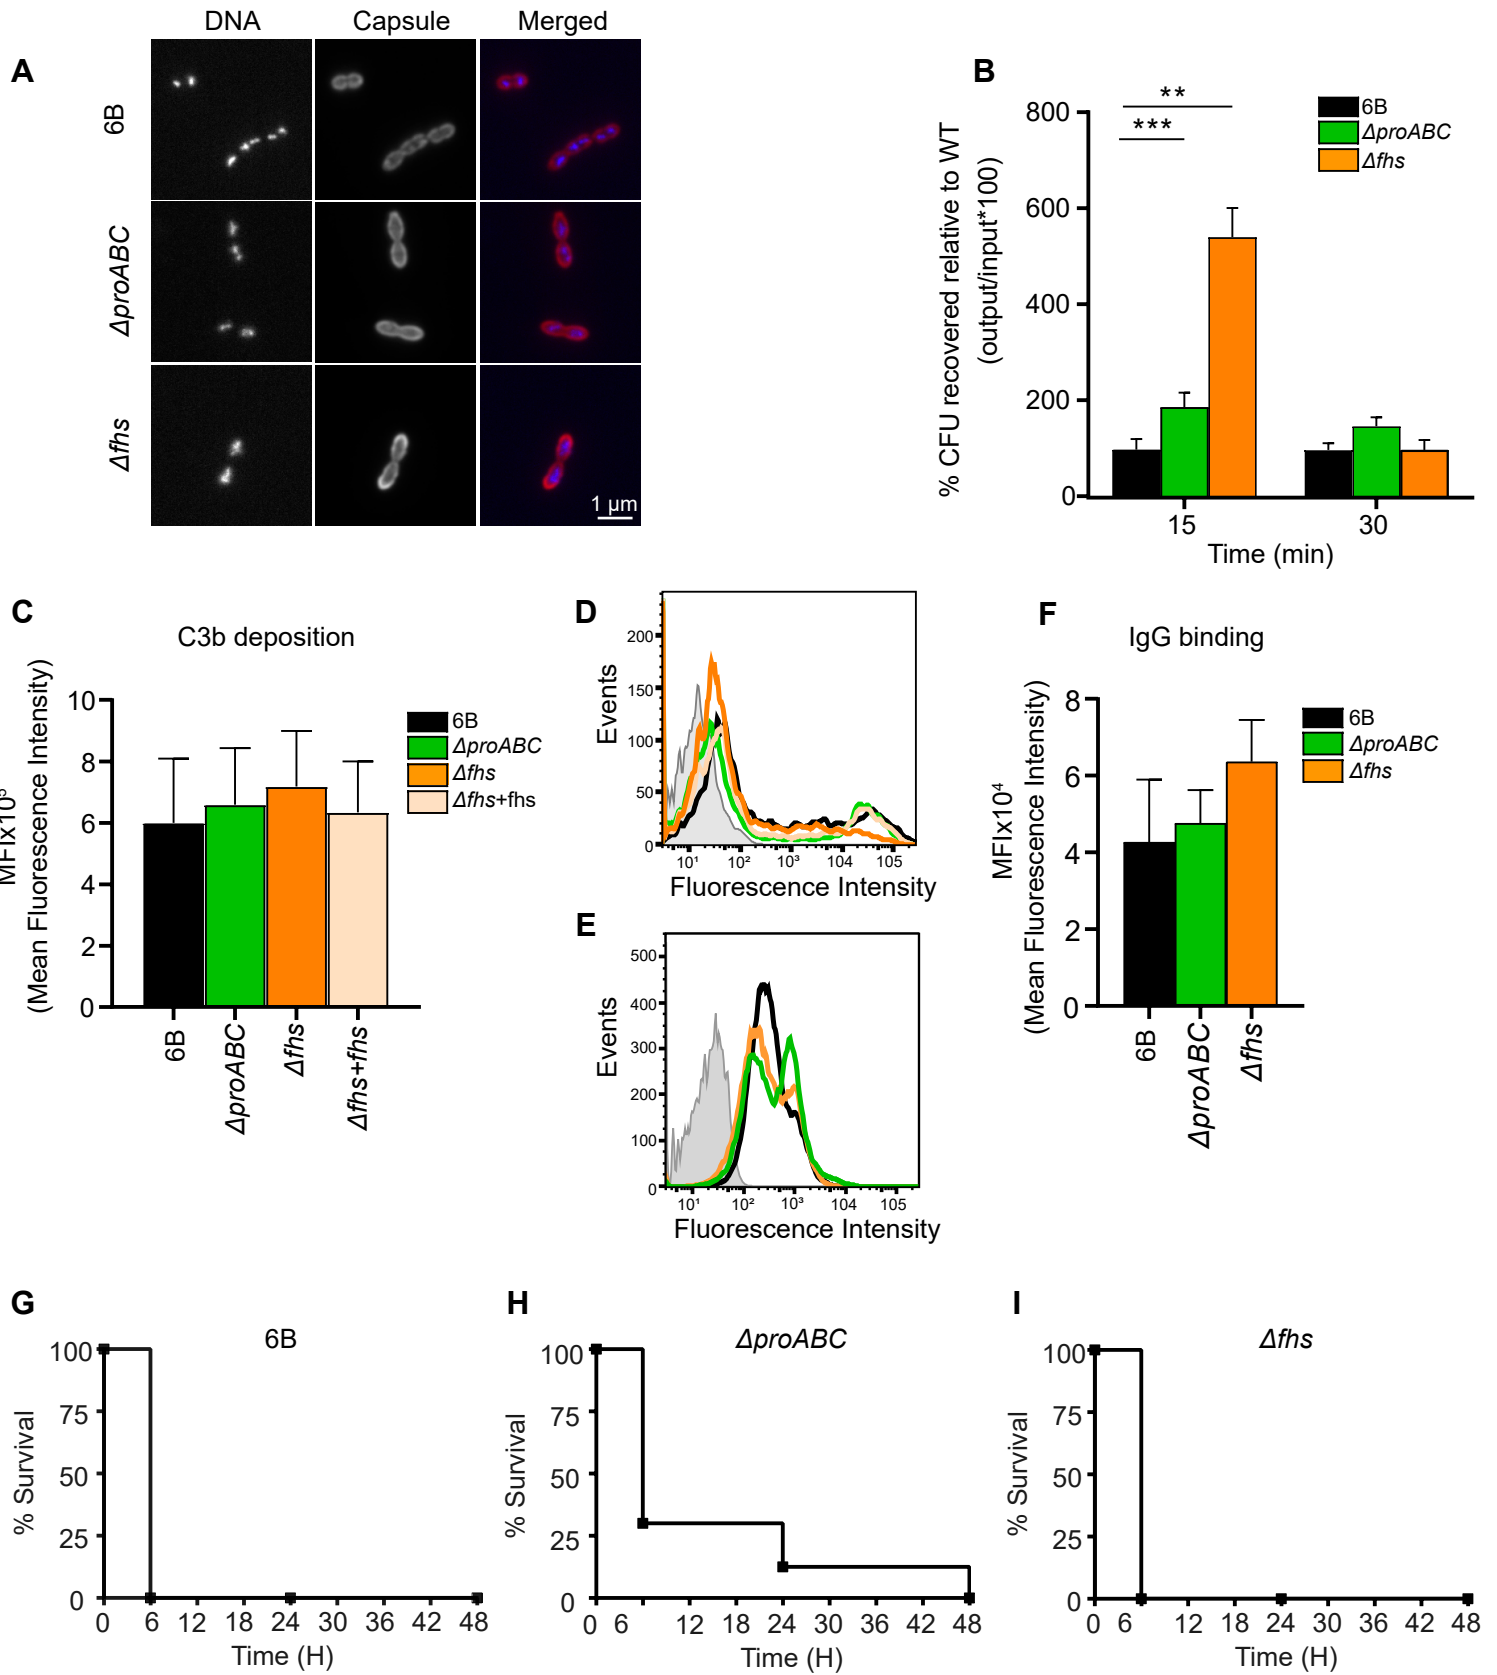

Supplementary Figure 3

**A**

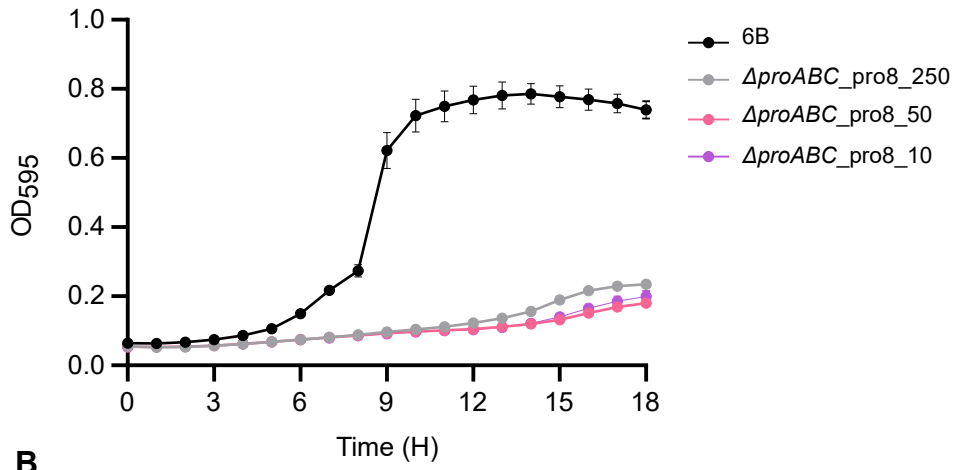

**B**

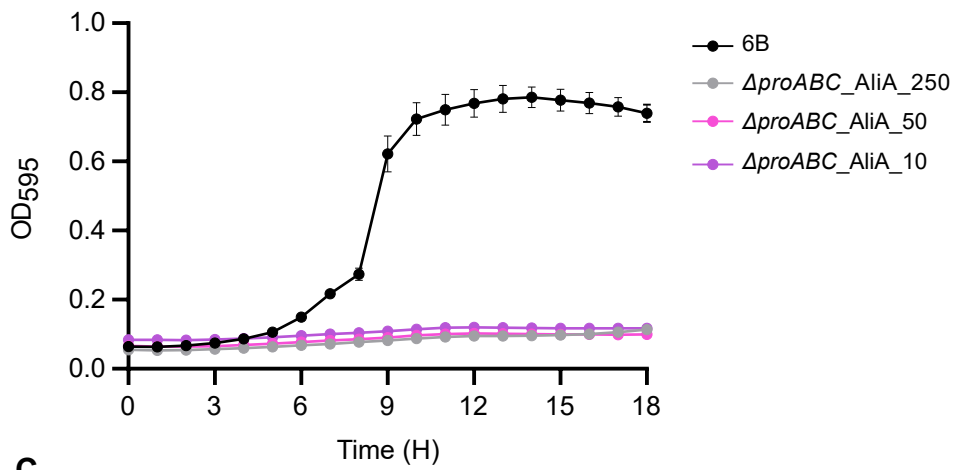

**C**

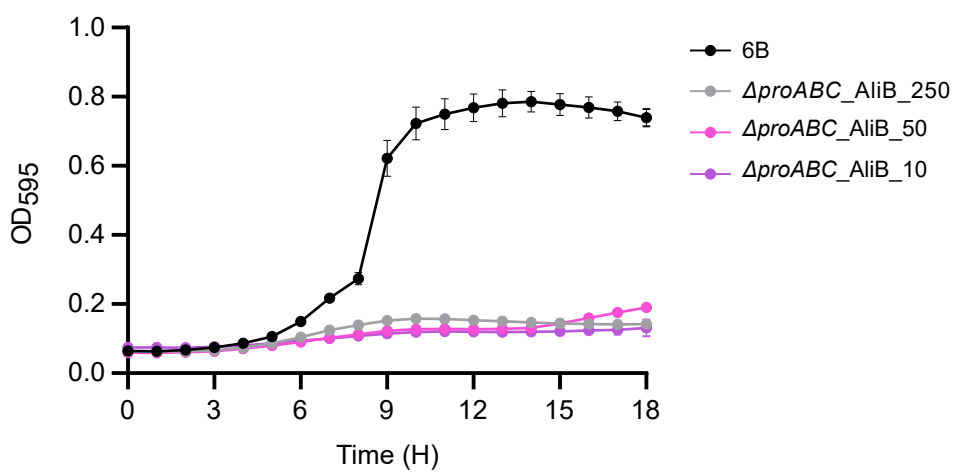

Supplementary Figure 4

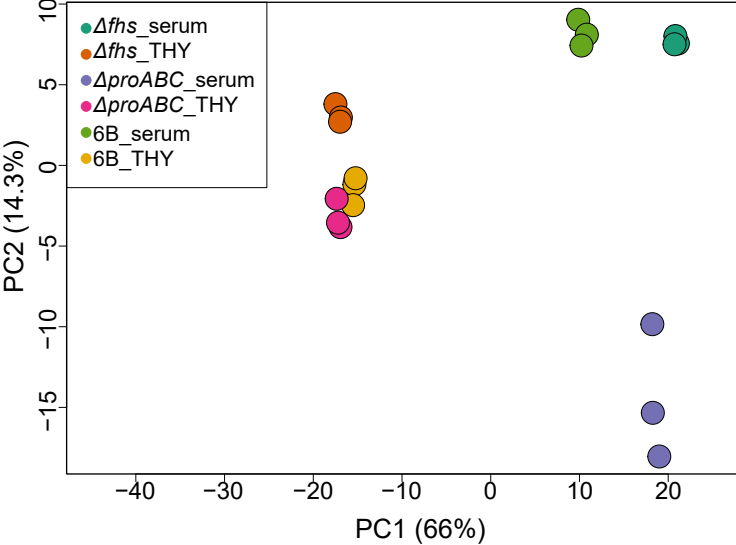

Supplementary Figure 5

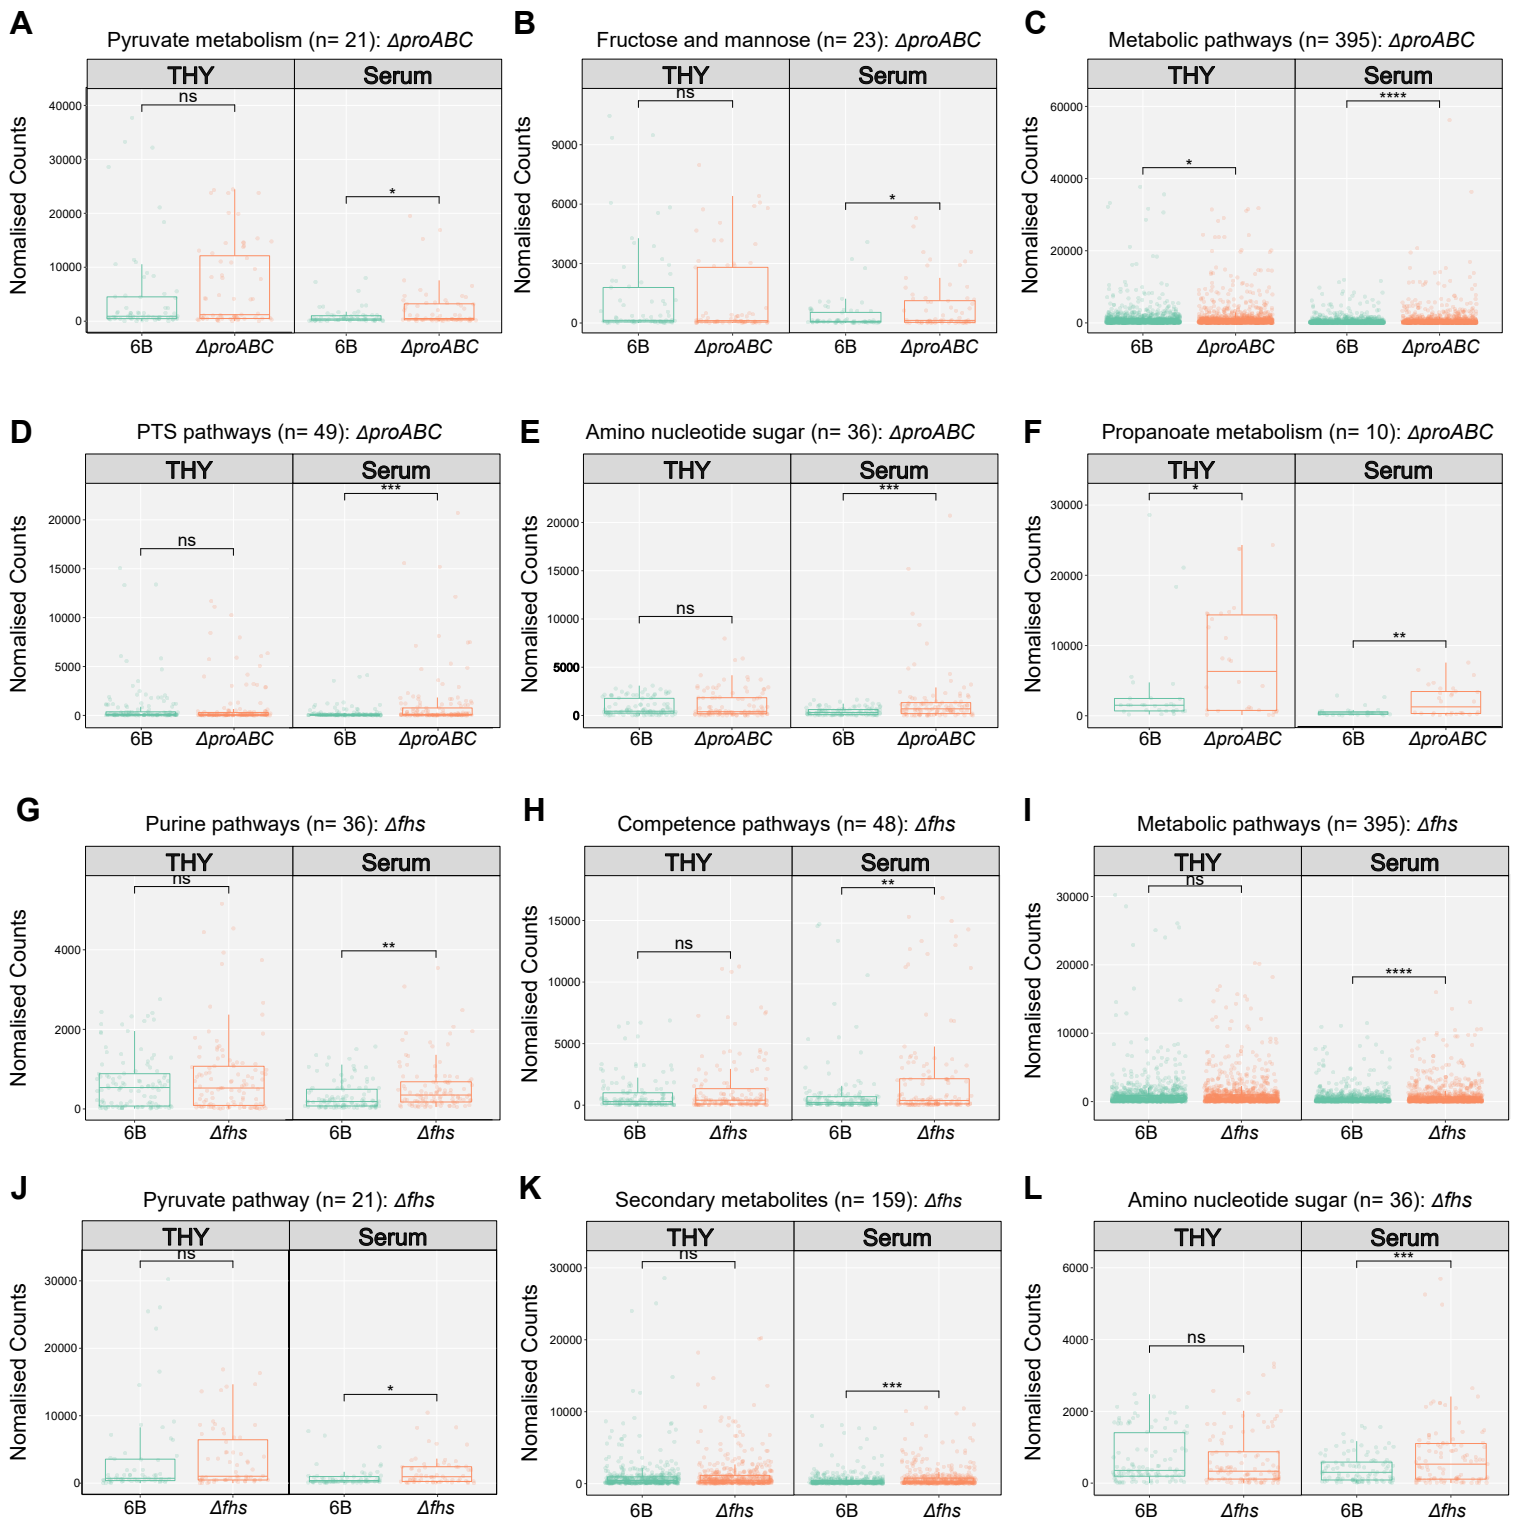

# Supplementary Figure 6

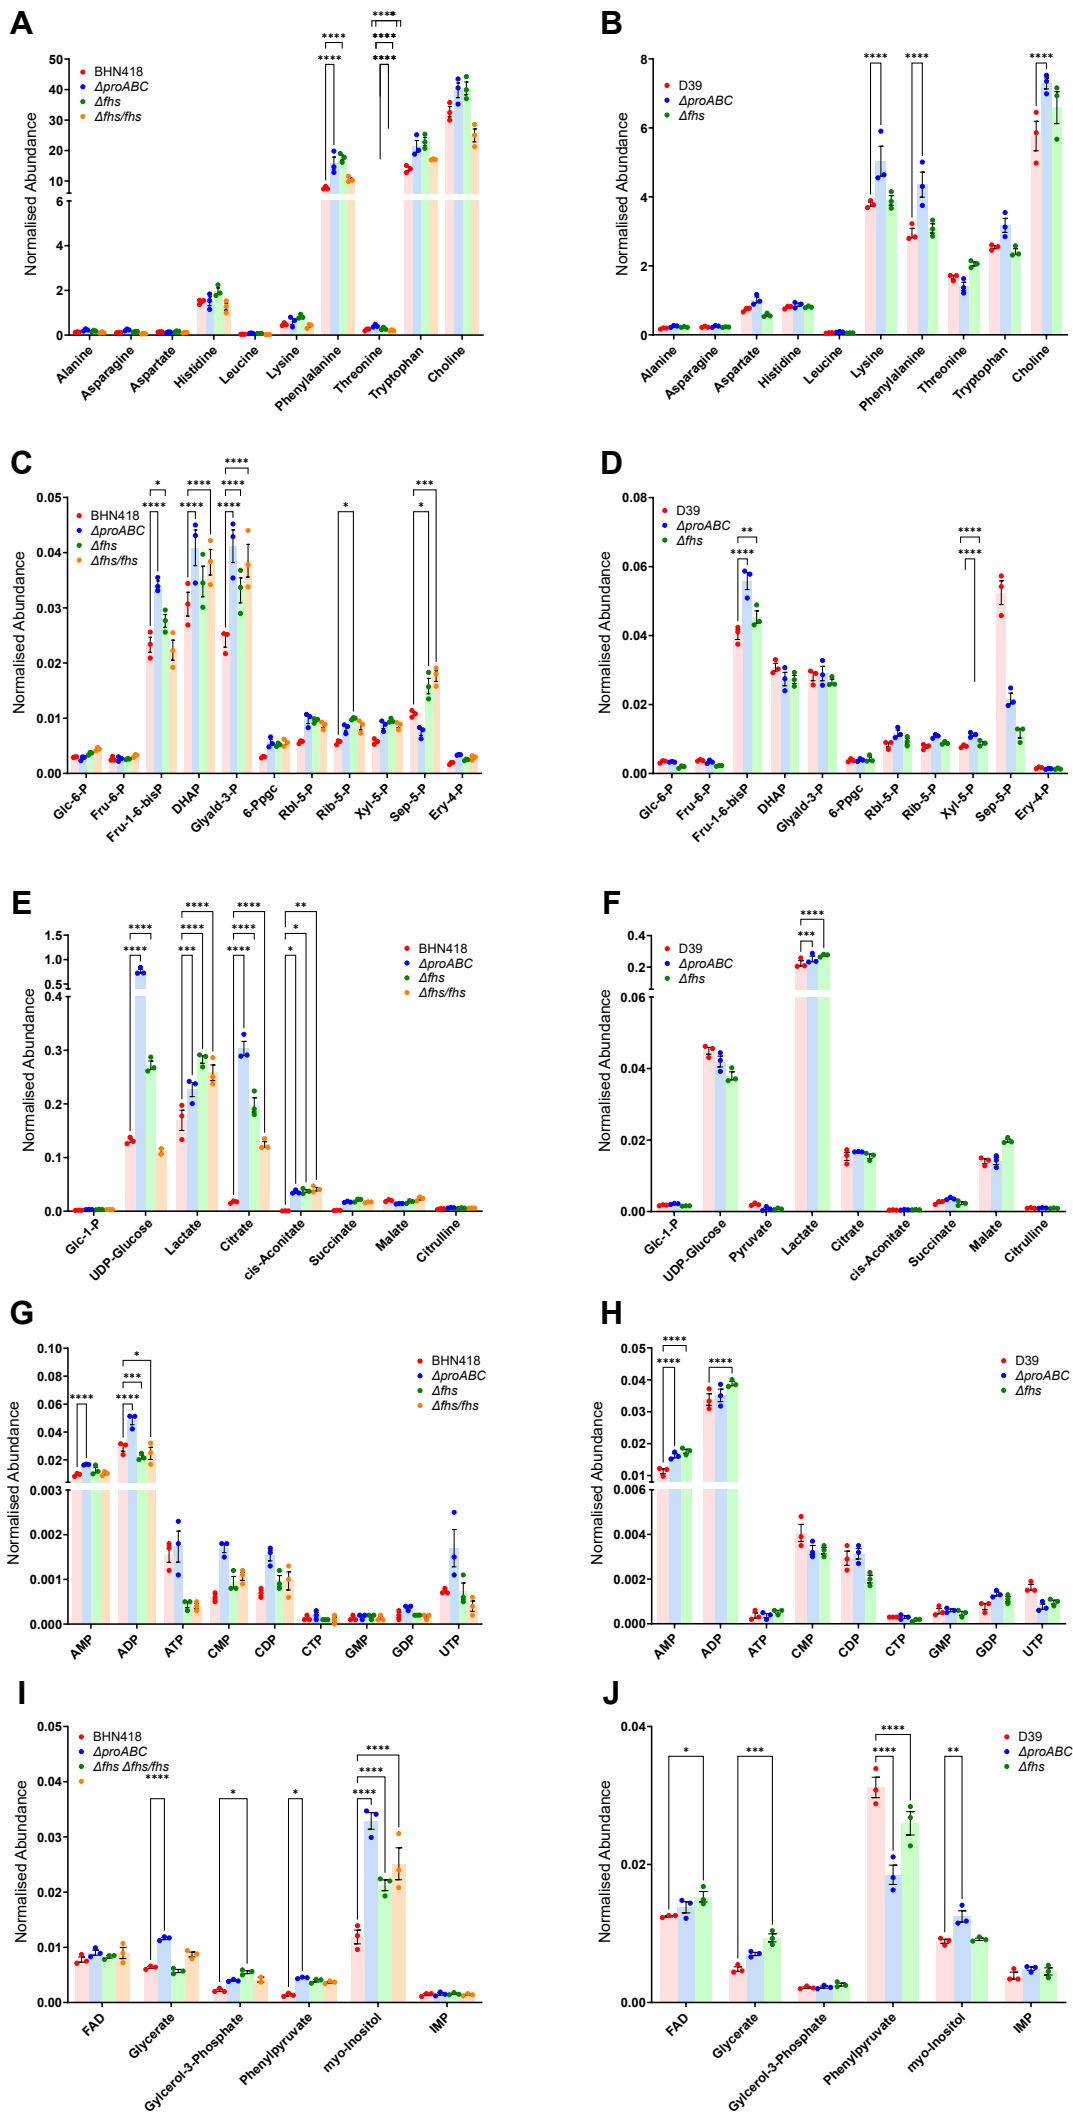

Supplement: mbio.01758-24-s0001.pdf [file mbio.01758-24-s0001.pdf]
